# Supplementary material
Source: publisher figshare collection journal article supplement (https://acs.figshare.com/ndownloader/files/3984874)
Supplement: Supplementary file 1 [file 3984874]

## Sheet: Sheet1
Table S4 mRNA and protein expression profiles of the spore germinant receptor proteins and the gene cluster CH1141-1160 in Bacillus thuringiensis strain CT-43.
The columns A~C represent the gene code in CT-43, conventional gene name, gene function annotated mainly by BLAST, respectively.
The columns D~G display the normalized gene expression level RPKM values (Reads Per Kilobase per Million mapped reads) of each gene at 7 h, 9 h, 13 h, and 22 h, respectively. A RPKM value of 2.0 is set as the threshold.
The columns H~K display the quantitative comparison of protein between each two growth phases.
The "7h vs. 9h" means that the protein abandent at 9 h is compared to that at 7 h. The remaining may be deduced by analogy.
The numerical value in red represents the up-regulated fold change, and that in green means the down-regulated fold. The forward slash "/" means that a protein could not be identified. The sign "---" means that a protein could be identified but failed to be quantified.
Gene code	Gene name	Gene function	7 h_RPKM	9 h_RPKM	13 h_RPKM	22 h_RPKM	7 h vs. 9 h	7 h vs. 13 h	7 h vs. 22 h	9 h vs. 13 h	9 h vs. 22 h	13 h vs. 22 h
Spore germinant receptor proteins (GRPs)
CT-43_CH0146	gerD	spore germination protein GerD	143.4	141	566.5	0	1.32979	5.1315	4.6545	7.3105	5.793	1.0917
CT-43_CH0553	gerKC	spore germination protein KC	0	0	5	0	/	/	/	/	/	/
CT-43_CH0554	gerKB	spore germination protein KB	0	0	54.7	0	/	/	/	/	/	/
CT-43_CH0555	gerKA	spore germination protein KA	0	0	15.1	0	/	/	/	/	/	/
CT-43_CH0687	gerLA	spore germination protein KA	0	0	130.6	0	/	/	/	/	/	/
CT-43_CH0688	gerLB	spore germination protein LB	0	0	78.1	0	/	/	/	/	/	/
CT-43_CH0689	gerLC	spore germination protein LC	0	0	39.7	0	/	/	/	/	/	/
CT-43_CH0736	gerB	GerB family spore germination protein	0	0	79.1	0	/	/	/	/	/	/
CT-43_CH0737	gerC	GerC family spore germination protein	0	0	11.5	0	/	/	/	/	/	/
CT-43_CH0738	gerA	GerA family spore germination protein	0	0	86.2	0	/	/	/	/	/	/
CT-43_CH1077	gerPF1	spore germination protein PF	0	0	395.3	0	/	/	/	/	/	/
CT-43_CH1078	gerPE	spore germination protein PE	0	0	1696.6	0	/	/	/	/	/	/
CT-43_CH1079	gerPD	spore germination protein PD	0	0	515.4	20.3	/	/	/	/	/	/
CT-43_CH1080	gerPC	spore germination protein PC	0	0	1547.5	2.6	1.217	2.4705	4.9115	2.2955	4.82	2.223
CT-43_CH1081	gerPB	spore germination protein PB	0	0	522.5	19.2	/	/	/	/	/	/
CT-43_CH1082	gerPA	spore germination protein PA	0	0	871.6	10.7	/	/	/	/	/	/
CT-43_CH2239	gerPF2	spore germination protein PF	0	0	0	178.1	/	/	/	/	/	/
CT-43_CH2425	gerAA	spore germination protein KA	0	0	71.9	0	/	/	/	/	/	/
CT-43_CH2426	gerBB	spore germination protein BB	0	0	199.4	0	/	/	/	/	/	/
CT-43_CH2427	gerBC	spore germination protein BC	0	0	19	0	/	/	/	/	/	/
CT-43_CH2438	gerQA	spore germination protein QA	0	0	112.5	15.7	/	/	/	/	/	/
CT-43_CH3098	gerSC	spore germination protein SC	0	0	42.1	0	/	/	/	/	/	/
CT-43_CH3099	gerSB	spore germination protein SB	0	0	36	0	/	/	/	/	/	/
CT-43_CH3100	gerSA	spore germination protein SA	0	0	87	0	/	/	/	/	/	/
CT-43_CH3449	gerSA	spore germination protein SA	0	0	37.9	0	/	/	/	/	/	/
CT-43_CH3450	gerSB	spore germination protein SB	0	0	30.8	0	/	/	/	/	/	/
CT-43_CH3451	gerSC	spore germination protein SC	0	0	20.1	0	/	/	/	/	/	/
CT-43_CH3518	gerSA	spore germination protein SA	0	0	55.4	0	/	/	/	/	/	/
CT-43_CH3519	gerSB	spore germination protein SB	0	0	25.8	0	/	/	/	/	/	/
CT-43_CH3520	gerSC	spore germination protein SC	0	0	10	0	/	/	/	/	/	/
CT-43_CH3779	gerPF1	spore germination protein PF	0	0	26.4	0	/	/	/	/	/	/
CT-43_CH4514	gerM	germination protein gerM	0	0	1399.3	0	1.1385	10.113	3.789	7.0805	1.452	4.62963
CT-43_CH4520	gerE	germination protein gerE	0	0	0	2287.9	1.179	1.3815	33.4445	1.2725	26.978	30.938
CT-43_CH4750		spore germination protein gerPA/gerPF	0	0	0	1033.3	/	/	/	/	/	/
CT-43_CH4754	gerHA	spore germination protein HA	0	0	72.6	0	/	/	/	/	/	/
CT-43_CH4755	gerHB	spore germination protein HB	0	0	30.9	0	/	/	/	/	/	/
CT-43_CH4756	gerHC	spore germination protein HC	0	0	15.7	0	/	/	/	/	/	/
CT-43_CH4826	gerPF	spore germination protein PF	0	0	1189.5	0	/	/	/	/	/	/
The gene cluster CH1141-1160
CT-43_CH1141		glycosyltransferase	0	0	2257.8	0	/	/	/	/	/	/
CT-43_CH1142		methyltransferase	0	0	1264.3	0	1.28617	5.406	4.239	5.529	4.469	1.06213
CT-43_CH1143		macrocin O-methyltransferase	0	0	4795.8	0	1.0983	3.365	2.8775	3.6695	3.0585	1.11483
CT-43_CH1144	bclA	collagen-like exosporium surface protein	0	0	1672.1	3833.5	/	/	/	/	/	/
CT-43_CH1145	bclB	collagen-like exosporium surface protein	0	0	17492.2	17854	/	/	/	/	/	/
CT-43_CH1146		Beta 1,4 glucosyltransferase	0	0	3518.6	0	/	/	/	/	/	/
CT-43_CH1147		O-antigen biosynthesis protein	0	0	1721.3	0	2299.26	9.936	4.0625	6.003	3.819	1.70794
CT-43_CH1148		hypothetical protein	0	0	2544.2	0	/	/	/	/	/	/
CT-43_CH1149		hypothetical protein	0	0	3109.7	0	2300.16	65.927	2984.36	2.464	3.3605	1.9295
CT-43_CH1150	rfbA	glucose-1-phosphate thymidylyltransferase	0	0	2147.8	0	1.2165	3.577	2.2955	2.911	2.3785	1.1396
CT-43_CH1151	rfbC	dTDP-4-dehydrorhamnose 3,5-epimerase	0	0	2978.5	0	1.0585	3.9275	7.576	3.5845	6.9665	2.247
CT-43_CH1152	rfbB	dTDP-glucose 4,6-dehydratase	0	0	2485.7	0	1.157	3.6145	4.932	3.5315	4.768	1.7315
CT-43_CH1153	rfbD	dTDP-4-dehydrorhamnose reductase	0	0	1501.8	0	---	---	---	7.668	8.9375	1.275
CT-43_CH1154	fabI	enoyl-(acyl carrier protein) reductase	1633	1056.9	196	0	1.18765	1.14679	2.17155	1.0505	1.83486	1.84162
CT-43_CH1155	yjbX	hypothetical protein	0	0	7420.1	0	/	/	/	/	/	/
CT-43_CH1156	cotY	spore coat protein Y	0	0	2001.4	6693.1	2300.13	16.7265	3566.76	3.572	20.5225	13.8525
CT-43_CH1157	ybaQ	integral membrane protein	0	0	1757.5	0	---	---	---	---	---	---
CT-43_CH1158		hypothetical protein	0	0	1734.1	157.5	/	/	/	/	/	/
CT-43_CH1159	bxpB/exsFA	hypothetical protein	0	0	101.4	23993.8	2331.59	6876.21	72752.3	164.547	30.5555	524.77
CT-43_CH1160	exsY/cotZ	spore coat protein Y	0	0	18571.4	153.1	3103.57	9135.57	15309.1	3.6325	8.5585	2.803
